# Supplementary material for: Evolutionary and phylogenetic analyses of 11 Cerasus species based on the complete chloroplast genome
Source: Front Plant Sci. 2023 Mar 3;14:1070600. doi: 10.3389/fpls.2023.1070600 (PMC10022824; doi:10.3389/fpls.2023.1070600)
Supplement: Supplementary file 2 [file Table_1.xlsx]

## Sheet: Table S1
	Table S1 Summary statistics for chloroplast genome assembly of 11 Cerasus species.
	Genome features	Genome size (bp)	LSC size (bp)	SSC size (bp)	IRA size (bp)	IRB size (bp)	Number of genes (unique)	Protein-coding genes (unique)	tRNA genes (unique)	rRNA genes (unique)	Exon	Intron	GC content (%)	Total reads	Assembled reads	Q30(%)	Average organelle coverage
	P. avium(wild)	157908	85999	19096	26405	26408	135(115)	89(80)	38(31)	8(4)	49	26	0.367	13462552	4445850	92.63	421.8
	P. cerasus	158200	86305	19153	26371	26371	135(115)	89(80)	38(31)	8(4)	49	26	0.366	16947232	1671174	92.94	1581.8
	P. cerasus × P. canescens ‘Gisela 6’	158192	86297	19153	26371	26371	135(115)	89(80)	38(31)	8(4)	49	26	0.366	23870502	2494741	92.66	2356.7
	P. fruticosa	158131	86231	19158	26371	26371	135(115)	89(80)	38(31)	8(4)	49	26	0.366	29793658	1590194	92.54	1506.7
	P. japonica	157927	86041	19114	26386	26386	135(115)	89(80)	38(31)	8(4)	49	26	0.367	1932810	1093648	91.7	1031.1
	P. mahaleb	157796	85926	19078	26396	26396	135(115)	89(80)	38(31)	8(4)	49	26	0.367	20304404	499148	91.2	473.7
	P. serrula	157867	85961	19120	26393	26393	135(115)	89(80)	38(31)	8(4)	49	26	0.367	18438304	163815	92.81	1039
	P. serrulata	158125	86070	19172	26432	26451	135(115)	89(80)	38(31)	8(4)	49	26	0.367	27920106	1531571	89.56	1452.2
	P. tianshanica	158830	86870	19153	26560	26497	135(115)	90(81)	38(31)	8(4)	49	26	0.365	30851334	9993608	91.75	9410
	P. tomentosa	157571	85836	19033	26351	26351	136(115)	89(80)	38(31)	8(4)	49	26	0.368	13458516	1089933	92.99	1034
	P. trichostoma	157848	85973	19083	26396	26396	135(115)	89(80)	38(31)	8(4)	49	26	0.367	13922140	1865115	94.91	1767
